# Supplementary material
Source: Springer Nature journal article supplement (https://www.springermedizin.de/resource/supplementary/12955_2013_1254_MOESM3_ESM.pdf/9559188)

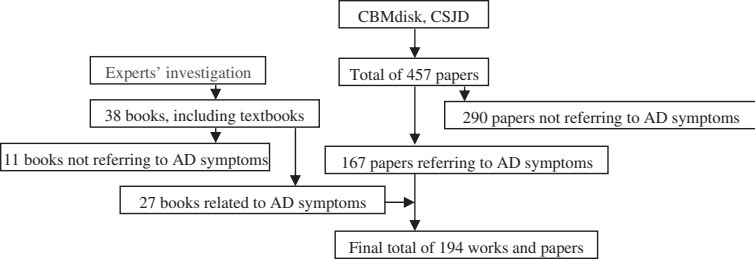

Supplement: MOESM3 [file 9559188]
